# Supplementary material for: Accuracy of triggering receptor expressed on myeloid cells 1 in diagnosis and prognosis of acute myocardial infarction: a prospective cohort study
Source: PeerJ. 2021 Jun 22;9:e11655. doi: 10.7717/peerj.11655 (PMC8231339; doi:10.7717/peerj.11655)
Supplement: Supplemental Information 2 [file peerj-09-11655-s002.xlsx]

## Sheet: Sheet1
ID	TRE_MEAN	Value	Type	M1	M2	M3	M4	M5	M6	M7	M8	M9	M10	M11	M12	M13	M14	M15	M16	M17	M18	M19	M20	M21	M22	M23	M24	M25	M26	M27	M28	M29	M30	M31	M32	M33	M34	M35	M36	M37	M38	M39	M40	M41	M42	M43	M44	M45	M46
1	119	1	1	51	1	0	0	1	1	0	0	0	170	87	30.104	67	114	71	11.34	3.76	122	170	65.1	38.1	27	27.4	10.1	55	226	625	2137	7.02	7.4	75	276	0.61	5.02	0.83	3.66	0.6	0.81	165	5.6	119		0.76	20.2	2.3	2.8
2	238	1	2	35	1	0	1	0	0	0	0	0	176	77	24.858	92	125	80	10.2	4.72	147	219	67.9	47.5	20.4	19.5	6.1	72	294	1007	2274	6.4	2.3	64	247	0.86	4.17	0.9	2.83	0.96	0.71	313	5.5	47.4		12	4.06	2	2.7
3	196	1	2	83	1	0	0	0	1	0	0	0	167	46.6	16.709	78	174	104	7.62	2.74	90	139	54	33.4	20.6	11.9	5.7	10	13	356	74	6.92	15.9	540	366	1.77	3.46	1.25	1.6	1.08	0.62	235		2300		2.2	53.2	2.1	3.6
4	219	1	1	75	1	0	1	0	2	0	0	0	163	59	22.206	80	107	64	5.65	3.53	108	139	72.5	38.4	34.1	9.7	2.8	13	17	187	158	16.97	11.9	198	476	1.94	5.35	0.9	4.12	0.78	1.08	216		282		1.152		2	2.9
5	164	1	2	58	1	0	1	0	3	0	0	0	167	63	22.59	72	196	112	9.3	4.81	141	213	52.9	32.6	20.3	21.4	8.2	49	59	967	283	5.49	4	67	209	0.85	4.67	1.01	3.06	0.8	0.75	592	5.5	529		13.8		2.4	3.5
6	181	1	2	63	1	0	1	1	3	0	0	0	175	69	22.531	130	110	70	12.1	5.14	171	184	62.9	41.4	21.5	16.9	6.6	17	46	259	418	5.68	6.4	84	378	1.25	3.12	0.79	1.83	0.86	0.47	365	5.7			1.3		2.7	3.4
7	178	1	2	62	1	0	0	0	2	0	0	0	170	71	24.567	80	121	87	12.58	4.46	141	210	61	38.2	22.8	21.3	6.5	61	270	541	3852	4.71	7.1	76	495	1.77	4.17	0.93	2.75	0.81	0.7	79	5.8		833	30	0.35	2.4	3.6
8	231	1	2	59	1	1	0	0	0	0	0	0	159	62	24.524	84	121	87	10.6	4.38	130	91	59.7	40.6	19.1	14.6	3.5	104	334	1001	3563	7.23	4.4	71	283	1.2	4.54	1.16	0.75	1.16	0.75	206		11.9		25		2.3	3
9	93	1	2	42	1	0	1	0	2	0	0	0	170	80	27.682	70	150	80	13.79	5.18	163	296	69.3	44.5	24.8	10.2	2.6	244	775	1663	5384	7.22	3.7	72	330	2.09	5.41	1.01	3.9	0.82	1.01	275	5.2	15.7	1530	25
10	255	1	1	79	0	0	0	1	0	0	1	1	160	75	29.297	94	159		17.36	3.8	118	142	53.8	29.9	23.9	21.3	10	23	45	429	232	15.86	6.9	68	261	0.91	3.34	0.83	2.07	0.68	0.67	153	8.8	841		2.3		2.5	3.5
11	140	1	1	59	1	0	1	0	3	0	0	0				55	149	80	8.4	4.52	154	140	60.7	38	22.7	16.7	4.2	52	203	700		7.2				1.03	4.67	1.24	2.99	0.94	1.02	99	5.7			9.267	13.4	2.3	3.7
12	117	1	2	36	1	0	1	0	0	0	0	0	175	78	25.469	65	105	75	12.26	4.66	139	218	57.6	35.6	22	7	1.8	70	240	617	3665	5.34	2.9	74	368	1.07	4.87	0.82	3.63	0.9	0.92	279			827	19		2.3	2.9
13	150	1	2	65	0	0	0	1	0	0	0	0	150	52.5	23.333	69	102	59	10.2	3.79	114	186	59.2	36.1	23.1	9.4	2.8	85	251	913	2976	10.8	5.3	56	247	2.4	3.61	1.07	1.85	1.33	0.5	130	7.2		2570	30	0.82	1.9	3
14	201	1	2	58	1	0	0	0	1	0	0	0	180	80	24.691	70	145	86					62.6	42	20.6	8.1	3.5	88	390	886	6178	6.31	4.4	62	351	0.4	2.82	0.95	1.46	1.14	0.44	291		138		28.8
15	116	1	2	56	1	0	1	0	0	0	0	0	160	70	27.344	80	130	90	14.31	5.26	157	136	61.4	37.8	23.6	8	2.2	70	227	783	2110	5.73	3.3	50	310	0.84	4.85	1.13	3.1	1.38	0.83	383			232	18		2	3.1
16	104	1	2	39	1	0	0	0	0	0	0	0	164	85	31.603	90	130	70	11.44	5.03	152	208	64.1	42.1	22	15.6	3.7	100	255	1034	3286	9.86	4	70	248	1.79	5.74	1.04	4.15	1.15	1.09	332	7.9		862	13		2	2.8
17	147	1	2	78	1	0	0	0	0	0	0	1	168	51	18.07	71	104	71					57	34.2	22.8	6.7	2.5	20	24	158	84	4.75	5.1	76	276	0.72	3.16	1.08	1.63	1.15	0.48	291			2400	0.058		2.2	3
18	177	1	1	77	1	0	0	0	0	0	0	1	165	50	18.365	70	130	86	9.03	3.62	105	283	62.3	28.6	33.7	8.8	2.1	5	12	198	20	4.37	5.7	69	367	1.13	3.4	0.72	2.24	0.85	0.61	475	5.4	3460		0.03		2.4	3
19	148	1	2	71	0	0	1	1	3	1	0	1	162	70	26.673	76	171	76	10.85	4.46	138	180	60.3	39.2	21.1	19	3	30	61	261	639	14.22	5.2	38	269	3.31	5.9	1.25	3.9	1.38	1.23	98	10.7	60		0.19		2.4	4
20	146	1	1	42	0	0	0	0	1	1	0	0	156	62	25.477	70	143	73	10.55	4.49	144	191	71	46	25	9.6	2.8	60	38	181						1.43	4.15	1.04	2.47	1.38	0.77	875	5.2	177		1.837		1.9	2.6
21	232	1	1	74	1	0	1	0	3	0	0	0	168	60	21.259	68	130	88	7.87	3.38	100	277	56.2	31.4	24.8	5.4	3.8	17	45	238	297	4.71	4.5	72	308	0.92	4.02	1.21	2.46	1.15	0.69	393	5.9		3980	1.8		2.2	3.1
22	87	1	2	68	1	0	1	1	3	0	0	0	168	75	26.573	90	190	110	6.36	2.72	83	223	49.4	26.3	23.1	3.8	0.4	31	45	319	834	7.24	26.4	672	417	1.08	7.41	1.68	5.2	1.51	1.59	1184	6.5		35000	0.092	0.75	2.5	3.5
23	203	1	2	73	1	0	1	0	2	0	0	0	170	67	23.183	66	158	90	8.16	4.63	152	187	56.5	37.3	19.2	9.3	3.4	50	188	496	2614	8.85	4.2	75	302	0.95	3.15	0.79	1.9	0.92	0.51	150	5.9		389	25		2.5	3.6
24	230	1	1	62	0	0	0	1	0	0	0	0	162	66	25.149	78	127	82	4.68	3.16	97	125	59.2	34.8	24.4	8.8	2.8	28	27	225	84	7.72	5.3	74	261	1.48	3.62	1.08	1.92	1.42	0.63	1182	7.4			1.7		2.2	3.5
25	102	1	2	48	1	0	1	0	2	0	0	0				70	130	86	10.91	4.57	144	169	68.9	42	26.9	20.9	6.3	119	182	484	1160	9.44	4.8	73	387	2.09	5.43	1.08	3.89	1.13	0.91	671	7.6	22.4		22	13.7	2.3	3
26	115	1	2	63	0	0	0	0	1	0	0	0	160	60	23.438	70	136	73	12.14	3.92	115	141	72.6	41.6	31	13	2.9	85	409	1062	3695	6.21	3.3	62	206	2.01	4.2	1.36	2.22	1.56	0.68	134	5.3	49.6		25		2.1	3.5
27	341	1	1	58	0	0	0	0	2	0	0	1	170	67.5	23.356	70	120	68	9.44	4.66	148	229	60.2	39.3	20.9	23.5	6.6	34	136	487	1090	5.45	4.7	93	338	1	4.39	0.99	3.1	1.2	0.73	69	5.7	139		23		2.3	3.9
28	221	1	2	61	1	0	1	0	2	0	0	1	169	72	25.209	78	125	77	4.17	4.61	139	147	59.1	36.2	22.9	6.8	2.2	34	19	144	46	7.65	5.4	88	530	1.5	3.34	0.71	2.19	1.14	0.79	355	6.5	117		20		2.3	3.7
29	403	1	1	83	0	0	0	1	3	0	0	1	154	50	21.083	83	159	78	15.95	3.33	98	265	49.9	31.3	18.6	4.4	0.9	36	74	441	695	24.24	20.7	195	422	7.12	4.8	1.45	2.38	0.95	0.72	56	9.4	337		14	6.08	2	2.8
30	96	1	2	55	1	0	0	0	0	0	0	0	170	66	22.837	78	125	76	9.89	4.45	141	136	65.9	39.9	26	14.6	4.9	47	184	349	1796	6.13	6.4	62	287	0.52	3.21	0.83	1.87	1.13	0.44	57	5.6	10.7		6.6		2.7	3.1
31	146	1	2	52	1	0	0	0	3	0	0	0	170	67.5	23.356	122	102	88	12.64	4.34	131	178	60.6	33.5	27.1	17.5	6.5	136	132	826	273	7.47	11.5	85	648	0.97	3.65	0.77	2.63	0.6	0.7	55	5.7		5170	11	55.4	2.2	3.3
32	219	1	2	56	1	0	1	1	3	0	0	0	162	89	33.913	78	122	70	10.57	3.84	113	150	65	40	25	15.6	6.5	22	18	185	30	7.26	7.4	84	396	1.31	3.66	0.72	2.66	0.99	0.75	843	5.9			0.018		1.8	3.6
33	73	1	2	54	1	0	1	0	0	0	0	0	168	70	24.802	91	139	86					64.2	39.2	25	9.6	2.7	20	79	256	688	5.07	4	71	327	1.65	4.79	1.05	3.07	1.16	0.93	178	4.9	9.2		2.7		2	3.6
34	148	1	1	57	1	0	1	1	0	0	0	0	168	70	24.802	79	130	62	12.39	5.23	151	155	57.2	38.7	18.5	12.2	4.1	66	201	807						1.14	3.24	0.9	1.92	1.26	0.64	245	6.2	39.3		19		2.4	2.8
35	158	1	2	53	1	0	1	0	3	0	0	0	158	80	32.046	105	155	98	12.84	4.95	148	257	70.3	41.5	28.8	14.9	4.3	116	515	1291	4570	12.43	4.7	58	329	4.11	4.7	1.17	2.78	1.08	1	144	8	63.6		25	0.82	2.5	3.7
36	307	1	2	56	1	0	1	0	0	0	0	0	173	65	21.718	85	132	70	12.86	4.88	140	296	65.3	35.7	29.6	18.7	4.8	40	133	635	929	5.06	5.1	94	323	1.17	4.88	1.13	3.24	1.1	1.08	1292	5.3	151		12		2.2	3.3
37	268	1	1	83	1	0	0	0	1	0	0	0	170	80	27.682	96	126	74	5.29	3.84	117	160	62.7	36.1	26.6	24.8	9.6	15	49	362	205	5.48	5.4	90	353	0.87	5.22	1.11	3.48	1.39	1.08	247	5.8	1330		1.1	0.82	2.2	3.4
38	222	1	2	70	0	0	1	0	0	0	0	0	155	60	24.974	73	111	59	10.06	4.6	145	243	62.3	39.8	22.5	29.6	6.3	42	216	574	1607	6.06	4.3	45	119	0.9	6.91	1.45	4.74	1.77	1.78	242	6		279	6.4		2	3
39	143	1	2	62	1	0	0	0	0	0	0	0	172	70	23.661	64	139	86	6.24	4.59	137	213	78.6	44.8	33.8	4.8	0	30	20	195			5.7	64	276								5.5	221		0.3		2.3	3.3
40	96	1	2	60	0	0	0	0	3	0	0	0	160	52	20.313	87	132	85	7.83	4.17	125	313	60.3	37.9	22.4	97	1.9	15	28	180	109	5.47	2.6	51	234	1.12	5.78	1.74	3.32	1.51	0.99	179	5.7			0.63		2.2	3.2
41	119	1	1	80	0	0	0	0	0	0	0	0	159	61	24.129	86	147	92	5.79	4.84	141	166	66.7	38.6	28.1	16.9	4.3	25	22	197	71	5.81	3.7	63	369	2.21	4.88	1.19	2.91	1.4	0.96	210	5.9	673		0.065	132	2.2	3.3
42	133	1	2	43	1	0	1	0	3	0	0	0	168	87	30.825	79	112	71	17.2	5.25	158	385	64.9	39.5	25.4	15.9	5.1	119	382	1277	2356	5.12	4.9	81	283	2.36	3.74	0.86	2.19	0.94	0.77	44	4.4		81	25		2.1	3.2
43	213	1	1	58	1	0	1	0	0	0	0	0	159	68	26.898	73	119	62	4.73	4.75	159	143	57.8	38.8	19	10.5	3.5	44	21	147						2.07	4.11	0.81	2.77	1.01	0.85	832	5.1			0.033		2.4	3
44	204	1	2	69	1	0	0	0	0	0	0	0	168	60	21.259	86	107	66	7.74	3.6	121	139	61	37.2	23.8	13.3	4.1	77	255	909	2271	8.65	5.2	94	339	1.22	4.48	1.04	2.78	1.28	0.83	79	6.2	482	268	25		2.3	3.2
45	248	1	1	58	1	0	1	0	0		0	0	171	70	23.939	79	117	73	5.46	5.48	156	264	65.8	39.2	26.6	12.8	2.6	31	32	189	147	5.29	5.5	76	396	2.19	6.06	1.33	3.83	1.42	1.08	153	6		30	1.822		2.5	3.1
46	345	1	2	55	1	0	1	1	3	0	0	0	181	82	25.03	94	134	95	10.85	5.82	170	258	71.3	41.1	30.2	7.4	7.4	30	101	279	852	14.78	5.1	57	329	1.29	4.51						10.7		191	5.4		2.1	3.4
47	113	1	2	55	1	0	1	0	0	0	0	0	170	80	27.682	74	103	63					59.9	37.7	22.2	9.1	2.2	62	253	693						2.42	5.8	1.11	3.78	1.19	1	96	5.7		873	25		2.3	3.4
48	188	1	1	63	1	0	0	1	0	0	0	0	168	79	27.99	92	104	64	7	4.48	141	173	74.8	46.4	28.4	18.4	5.3	23	84	274	1841	6.91	8.1	128	357	3.35	4.67	1.18	2.36	1.55	0.71	126	5.4	125		0.734		2.4	3.1
49	191	1	1	76	0	0	0	0	3	0	0	0	155	52	21.644	50	120	80	4.79	3.46	111	80	74.9	41.1	33.8	22.2	6.6	15	23	182	111	5.73	6.7	88	448	1.55	3.88	1.28	2.07	1.39	0.64	30	6.4	796		0.19	0.82	2.3	3
50	152	1	1	57	1	0	1	0	0	0	0	0	173	81	27.064	80	130	70	7	4.83	147	170	58.3	38.3	20	8.7	2.5	24	19	150	106	4.37	6.7	77	352	1.33	4.33	0.89	2.89	0.9	0.82	966				0.013		2.4	3.3
51	80	1	1	74	0	0	0	0	0	0	0	0	158	64	25.637	80	126	80	6.68	4.27	129	286	65.6	38.4	27.2	12.4	2.1	14	31	166	127	5.29	4.6	74	341	1.79	6.63	1.69	4.13	1.44	1.21	189	6.3			0.2	0.82	2.4	3
52	147	1	2	56	1	0	0	0	0	0	0	0	180	90	27.778	88	136	90	7.2	5.32	152	180	61.3	38.1	23.2	15.3	2.7	67	262	771	1961	9.49	3.5	84	320	5.51	7.26	1.62	3.05	1.15	0.8	147	6.6		238	24		2.3	3.6
53	141	1	1	71	0	0	0	0	3	0	0	1	160	70	27.344	95	135	92	16.94	3.71	112	152	61.5	39	22.5	26.2	9.8	83	325	1222	1940	8.11	13.2	115	822	1.01	4.41	1.13	2.86	1.2	0.83	151	6	2110	23600	6.4	71.9	2.2	3.8
54	174	1	2	59	1	0	1	0	3	0	0	0	162	69	26.292	77	118	66	13.67	4.09	133	307	58.3	35.5	22.8	13.6	3.6	29	76	455	652	9.05	3.7	79	177	1.08	4.6	0.92	3.11	1	1.09	177	7.6	267		0.662		1.9	3.1
55	185	1	1	65	0	0	0	1	3	0	0	0	144	52	25.077	112	120	77	16.98	4.37	135	208	67	39.2	27.8	16.8	5.9	46	127	592	757	13.57	9.1	86	372	1.95	4.21	0.96	2.55	0.97	1.08	208		534	1000	1.57	301	2.2	3.4
56	125	1	2	46	1	0	1	1	0	0	0	0	170	73	25.26	71	104	74	12.84	5.58	159	149	66.7	40.4	26.3	33.2	6.2	81	286	980	2075	7.82	5.2	73	344	1.47	6.73	1.26	4.76	1.25	1.23	270	9.3	121		24	20	2.2	3.2
57	149	1	2	67	1	0	0	0	1	0	0	0	170	75	25.952	80	115	70	11.84	4.65	138	182	66.4	43.6	22.8	10.8	3.6	112	599	1189	9310	8.66	6.3	66	310	0.52	3.75	1.06	2.13	1.37	0.69	730	6.1			0.193	0.86	2.2	3.5
58	202	1	2	75	0	0	0	1	2	0	0	0	155	65	27.055	62	164	70	12.09	4.63	133	203	68.8	40.6	28.2	28.5	5.3	33	148	610	1051	9.61	4.6	74	273	1.58	6.18	1.77	3.93	1.6	1.13	77		382		0.9	15.9	1.8	3.7
59	299	1	1	68	1	0	1	1	2	0	0	0	171	60	20.519	109	123	78	8.41	3.7	108	168	64.5	33.6	30.9	6.4	1.7	47	36	417	212	7.35	36.2	397	780	1.3	4.28	1.27	2.6	1.13	0.85	101	9.7	5000		14.1	159	2.5	3.4
60	274	1	2	64	1	0	0	0	0	0	0	0	165	65	23.875	93	128	81	8.18	4.06	121	111	62	34.9	27.1	8.9	3	84	70	547	176	6.27	7.4	106	477	1.57	4.72	0.94	3.19	0.93	0.95	270			8070	18		2.5	3.9
61	120	0	3	53	0	0	0	0	2	0	0	0	160	65	25.391	86	135	78	4.85	4.21	136	265	68.5	42.9	25.6	8.9	2.6	34	24	234	199	5.09	8.4	65	286	0.99	5.24	1.32	3.28	0.95	0.86	490		7.5		0.001		2.1	2.6
62	247	0	3	52	0	0	0	1	1	0	0	0	158	68	27.239	72	128	69	5.09	3.92	115	228	78.4	45	33.4	4.1	0.3	17	25	208	113	5.21	3.9	65	342	2.53	5.89	1.15	3.99	1.22	1.11	61	5.5			0.002	0.81
63	135	0	3	38	1	0	0	0	2	0	0	0	170	79	27.336	70	150	100	6.24	5.32	162	294	66.9	42.3	24.6	12.8	3.8	25	20	151	112	5.11	4	80	503	2.71	3.8	0.99	2.28	1.1	0.66	45				0.001		2.1	2.8
64	116	0	3	51	0	0	0	1	0	0	0	0	165	81	29.752	73	155	76	7.06	5.01	142	191	57.9	34.1	23.8	6.4	1.2	42	28	198	105	12.94	6.1	47	276	4.23	5.19	1.19	3.2	0.94	0.85	52	7.9	9.7		0.001
65	115	0	3	61	0	0	0	0	0	0	0	0	158	56	22.432	76	120	70	5.52	4.07	126	211	56.1	36.8	19.3	10.5	2.8	10	21	125						2.14	4.01	0.96	2.63	1.1	0.69	288				0.002		2	2.7
66	117	0	3	47	0	0	0	0	0	0	0	0	154	55	23.191	89	131	75	6.62	4.08	129	212	62.1	36.9	25.2	11	2.7	13	20	143	38	4.48	6.9	61	193	0.53	5.07	1.62	2.91	1.3	1.01	48	4.8			0.0001		2	3.3
67	77	0	3	48	0	0	0	0	0	0	0	0	158	60	24.035	103	153	76	11.13	4.18	132	332	61	39.6	21.4	14.2	3.3	10	13	144	47	5.22	3.8	54	239	0.83	5.31	1.03	3.52	1.02	1.13	102				0.01		2	2.9
68	200	0	3	73	0	0	0	0	3	1	0	0	162	65	24.768	90	150	80	6.51	4.78	148	186	64.4	38.4	26	9.5	3.3	15	20	228						1.47	3.76	1.03	2.08	1.38	0.64	157		66.2		0.01	0.86	1.8	3.1
69	132	0	3	70	0	0	0	0	3	0	0	0	158	72	28.842	79	130	84	6.69	4.57	139	143	64.1	40.4	23.7	11.9	2.8	27	24	172						2.71	5.21	1.8	2.82	1.64	0.92	195				0.001		2	3.9
70	106	0	3	52	1	0	0	0	3	0	0	0	173	84	28.066	80	126	80	6.31	5.48	166	212	77.8	48.5	29.3	10.3	2.2	31	24	151	85	5.97	7	75	519	2.17	5.93	1.41	3.89	1.38	1.09	63	5.8			0.012	0.82	2.1	3.7
71	205	0	3	59	1	0	0	0	0	0	0	0	175	82	26.776	87	125	81	4.81	5.05	152	150	62.6	37.9	24.7	12.3	3.3	28	19	142	70	10.18	4.6	83	322	2.89	3.6	1.05	1.75	1.3	0.65	16	9			0.003		2.2	3.1
72	78	0	3	46	1	0	0	0	0	1	0	0	172	84	28.394	109	136	93	7.08	5.23	161	205	75.4	43.6	31.8	14.8	4	137	70	212	46	8.09	5.5	67	367	2.48	6.36	1.47	4.22	1.43	1.15	34	7.9			0.0001	10.4	2.4	4
73	114	0	3	60	0	0	0	0	2	0	0	0	157	66	26.776	70	152	97	7.34	4.74	150	155	62	42.9	19.1	11.5	3.6	31	26	207	165	6.02	5.2	62	318	0.63	3.21	0.94	1.77	1.29	0.55	133	5.6			0.022	0.82	2.2	3.4
74	71	0	3	39	1	0	0	0	0	0	0	0	172	82	27.718	85	118	81	6.57	5.38	174	225	67	45	22	21.4	5.8	31	15	180	76	6.07	5.2	99	339	1.7	6.06	1.43	4.09	1.48	1.1	149	5.6			0.0001	0.82	2.4	3.1
75	126	0	3	51	0	0	0	0	1	0	0	0	159	64.5	25.513	65	134	82	6.11	4.22	127	226	67.5	44.3	23.2	10.3	2.5	29	22	143						1.35	4.42	1.05	2.68	1.48	0.78	72	4.6			0.01		2.1	3
76	75	0	3	62	0	0	0	0	0	0	0	0	164	57	21.193	68	120	70	10.28	3.78	108	159						22	22			6.53		51	264			2.08	3.32							0.001	41.7	2.1	3.6
77	255.75	1	2	50	1	0	1	1	0	0	0	0	175	95	31.02	80	144	88	9.72	4.94	141	187	66.3	44	22.3	19	4.4	50	116	574	1234	11.61	3	71	423	4.46	4.8	1.17	2.75	1.33	0.9	345	7.1	8.9		30		2	3.1
78	224.5	1	2	65	1	0	1	0	0	0	0	0	165	69	25.344	99	125	75	16.8	4.32	132	148	57.1	35.5	21.6	51.3	28.9	78	195	1418	2268	16.47	13.8	117	308	1.59	3.97	0.85	2.47	0.75	0.78	164	8.5	1400		5.73		1.9	3.1
79	317	1	1	54	1	0	1	0	3	0	0	0	172	94	31.774	92	143	91	10.12	2.51	74	237	61.6	35.8	25.8	4.1	0.4	17	18	398	137	5.88	22.5	512	578	1.04	4.13	0.84	2.79	0.96	0.75	188	6	1740		2.2		2.1	3.6
80	392.25	1	2	51	1	0	1	0	0	0	0	0	167	75	26.892	113	128	77	8.76	4.48	136	217	62.4	38	24.4	7.1	1.8	60	45	313	114	11.82	9.3	69	588	4	5.37	1.36	2.92	1.11	1.12	28	10.8		6740	0.93		2.1	3.2
81	313	1	1	43	1	0	1	1	3	0	0	0				88	145	98	13.64	4.71	143	279	68.5	43.1	25.4	15.5	3.8	47	226	830	913	7.89	5.4	65	340	2.29	4.42	0.91	2.9	1.11	0.87	69	6.8	125		1.2		2.3	3.2
82	203.5	1	1	36	1	0	1	0	0	0	0	0	177	97	30.962	102	136	86	15.21	4.93	151	323	67.1	42.2	24.9	13.4	2.2	40	46	393	348	12.1	5.1	53	239	4.76	7.71	1.57	4.84	1.22	1.49	503	8.4	458		30		2.4	3
83	94.75	1	2	64	1	0	1	1	3	0	0	0	168	70	24.802	88	127	72	7.53	5.12	158	223	64.9	39.6	25.3	9.7	2.2	35	93	281	979	14.25	5.5	75	222	2.62	3.84	1.11	1.96	1.41	0.67	29	9.8	44.8		30	3.35	2.4	3.5
84	150	1	2	43	1	0	1	0	0	0	0	0	175	80	26.122	82	97	60	14.13	4.01	124	246	58.9	39.6	19.3	19.6	5.7	157	507	961	7101	6.51	4.5	79	354	0.87	4.12	1.08	0	1.27	0.69	41	5.5	810		25		2.2	3.2
85	213.5	1	2	61	1	0	1	1	0	0	0	0	165	68	24.977	72	112	80	10.1	4.75	151	276	61	39.3	21.7	8.6	1.1	33	197	336	1692	6.68	6.4	65	389	0.96	5.07	1.13	3.26	1.22	0.98	97	5.8		52	25		2.5	3.7
86	381.5	1	2	82	1	0	0	0	3	0	1	0	165	70	25.712	86	141	104	11.06	4.46	135	164	61.3	36.6	24.7	17.8	6.8	308	859	2199	5296	14.2	9.9	145	342	0.72	3.23	1.01	1.75	1.06	0.57	197		535		6.3
87	268.5	1	1	56	0	0	0	0	3	0	1	0	162	67	25.53	20	110	70	12.06	3.83	120	293	63	37.8	25.2	11.1	3.1	24	81	500	357	6.01	4.3	61	321	1.65	4.16	1.16	2.49	1.28	0.76	240	5		4990	10		2.1	3.4
88	211.25	1	1	73	0	0	0	0	3	0	0	0	160	65	25.391	150	150	67	17.86	3.82	116	184	55.9	33.1	22.8	10.3	2.5	14	41	486	165	8.17	7.2	78	345	1.73	3.29	1.02	1.82	1.26	0.6	266	5.9	803		4.81	16.1	2.2	3.5
89	196.75	1	1	67	1	0	1	1	3	0	0	0	174	82	27.084	89	158	77	8.79	4.67	137	177	71.6	40.5	31.1	15.2	3.9	23	27	211	114	11.7	4.5	73	260	1.93	3.25	0.92	1.68	1.31	0.62	44	8.8	185		0.37	0.82	2.3	3.5
90	284.5	1	2	35	1	0	1	1	3	0	0	0	187	103	29.455	106	161	117	9.01	4.66	144	133	59.3	34.5	24.8	9.2	2.4	68	305	604	2513	12.93	4.5	70	464	1.03	4.46	0.86	3.29	1.12	0.84	236	7.5		3880	13		2.5	3.5
91	225.25	1	2	63	1	0	0	0	2	0	0	0	169	82	28.71	84	137	96	8.66	4.63	145	177	59.4	35.8	23.6	16.1	3	37	81	313	626	5.17	3	65	354	3.67	4.73	1.25	2.48	1.31	0.8	13	5.4	169		24.8		2.4	3.9
92	113.25	1	2	59	1	0	1	1	3	0	0	1	158	53	21.231	91	136	77	2.75	4.64	136	133	58.8	31.4	27.4	5.1	1.1	9	16	252	93	6.43	5.9	72	305	2.01	4.67	1.01	2.8	0.93	0.86	210	7.9	1018		0.064		2.3	3.3
93	191.5	1	2	85	0	0	0	0	3	0	0	0	153	50	21.359	110	147	82	8.5	4.16	126	375	60.5	33	27.5	8.4	2.6	18	22	241	106	6.18	5.6	55	304	0.91	2.61	1.14	0.83	1.16	0.3	72			14700	0.59		2.1	3.9
94	225	1	1	50	1	0	1	0	0	0	0	0	184	80	23.629	60	112	60	17.22	4.83	147	539	68.1	37.9	30.2	13.3	3.9	95	63	549		5.57	6.9	76	402									316		27	125	2.5	3.6
95	150.75	1	1	74	1	0	0	0	2	0	0	0	157	55	22.313	90	137	70	9.7	4.67	147	233	67.8	38.4	29.4	18	4	56	69	234	284	7.5	7.3	119	252	2.56	4.19	1.04	2.24	1.25	0.76	33	7		132	0.12	5.98	2	2.8
96	275.5	1	1	66	1	0	0	1	3	0	0	0	176	75	24.212	97	159	90	11.53	4	116	116	65.9	37.6	28.3	8.9	2.5	12	18	174	107	3.97	12.9	197	523	0.88	3.06	0.88	1.58	1.02	0.52	454	5.7		2990	0.025	6.27	2.1	3.5
97	53	1	2	67	1	0	0	1	3	0	0	0	168	66	23.384	60	99	55	8.11	3.92	116	176	66.7	40.2	26.5	16.7	5.2	30	183	388	2702	11.04	5.2	69	302	0.26	4.46	1.19	2.66	1.13	0.69	323			366	12		1.7	3.5
98	470	1	1	82	1	0	0	0	3	0	0	1	170	80	27.682	75	164	84	9.09	4.61	144	139	69.6	39	30.6	20.2	5.6	24	30	170	125	7.45	8.4	95	525	2.4	5.21	0.96	3.6	1.11	1	114	7.6		158	0.036		1.8	3.8
99	61	1	2	49	1	0	0	0	1	0	0	0	162	70	26.673	108	134	101	6.68	5.07	145	198	66.3	40.6	25.7	6.6	2.4	67	252	915	3498	5.65	3.3	53	324	1.04	2.93	0.81	1.55	1.03	0.52	288	5.8		36	25		1.8	3.3
100	177.5	1	1	78	0	0	0	1	3	0	0	0	168	60	21.259	63	181	61	5.84	3.45	111	192	58.2	31.2	27	12.6	3	23	45	420	459	8.14	5.8	116	292	1.08	6.11	1.66	3.59	1.17	0.99	1122	7.8			1		1.6	3.5
101	185	1	2	58	1	0	1	1	1	0	0	0	171	75	25.649	58	87	56	6.02	4.54	136	174	64.1	38.1	26	12.1	3.4	41	59	493	473	8.16	4.1	60	256	2.09	3.84	0.86	2.34	1.18	0.78	380	7.8	194		15	8.51	2.6	3.7
102	226.25	1	2	71	1	0	0	0	3	0	0	0	172	92	31.098	86	156	89	11.36	4.71	138	329	71.6	39.5	32.1	18.4	4.7	35	117	440	1152	5.92	4.7	97	424	1.37	4.64	0.76	3.38	0.74	0.87	88	5.9	432		5.7	22.4	2.6	3.3
103	130.75	1	1	73	1	0	1	0	1	0	0	0	165	65	23.875	75	155	75	6.6	4.36	130	181	68.7	40.2	28.5	14	3	16	18	153		7.88	3.6	67	395	2.99	5.14	1.14	3.2	1.06	0.95	127			148	0.1		2.3	3.6
104	118.25	1	1	57	1	0	0	0	1	0	0	0	168	87.5	31.002	65	118	71	7.28	4.56	141	231	68.7	40.9	27.8	16.6	3.5	20	26	277	181	4.99	6.7	99	377	1.38	5.73	1	4.07	0.93	1.03	283	5		779	0.23	4.76	2	3.4
105	216.25	1	1	49	1	0	1	0	1	0	0	0	160	66	25.781	84	155	80	6.74	5.11	149	200	67.4	41.1	26.3	10.9	2.3	26	17	214	76	6.56	6.3	49	265	2.25	5.23	1.12	3.2	1.21	0.89	278	6.4	44.6		0.024	0.82	2.6	3.6
106	123	1	1	66	1	0	1	0	0	0	0	0	168	72	25.51	70	142	67	9.7	4.73	156	222	62.8	37.1	25.7	21.9	4.9	30	102	548	737	5.7	6.3	70	245	0.81	5.35	0.94	3.8	0.98	0.95	134			2390	2.5	44.1	2.2	3.7
107	151.25	1	2	60	1	0	0	0	1	0	0	0	169	65	22.758	91	105	65	7.01	5.86	176	172	58.3	35.6	22.7	17.4	3.8	44	128	730	1199	6.16	3.9	79	197	1.07	5.11	1.28	2.87	1.23	0.81	369			187	14		2	3.5
108	231.5	1	2	74	0	0	0	1	0	0	1	0	154	67.5	28.462	51	104	60	9.7	4.69	144	240	59.3	34.7	24.6	15.6	3.5	49	63	518	369	7.27	5.1	69	301	1.41	4.32	0.89	2.73	1.12	0.82	269	8.4		4200	20		1.6	3
109	429	1	2	67	0	0	0	1	1	0	0	0	160	70	27.344	72	132	71	4.32	3.25	100	365	61.6	31.5	30.1	9	2.8	55	20	340	42	13.47	6.6	177	416	1.43	4.27	1.11	2.47	1.09	0.8	131	8.2	4100		0.26	14.1	2	3.7
110	143.5	1	2	75	1	0	1	1	0	0	0	0	175	78	25.469	70	117	70	7.79	4.32	122	271	72.2	37	35.2	27.3	11	14	16	503	152	8.41	9	107	209	0.53	2.32	0.8	1.05	0.95	0.42	243	8.7		3150	0.11	8.17	2	4.6
111	216.25	1	1	68	0	0	0	1	1	0	0	0	161	57	21.99	86	143	78	8.57	2.9	78	269	59.1	30.7	28.4	6.5	0.8	9	24	377	217	11.3	17.8	433	254	2.59	7.23	1.57	4.29	1.09	1.21	776			27100	3.9		1.6	2.9
112	153.5	1	2	39	1	0	0	1	0	0	0	0	175	75	24.49	78	130	80	5.93	5.04	155	159	67.7	42.3	25.4	24.1	5.2	57	167	710	1221	11.63	3.6	61	374	3.03	4.54	0.99	2.57	1.11	0.81	100	7.5	5		7.1		2.2	3.3
113	186.5	1	2	69	0	0	0	0	1	0	0	0	159	59	23.338	83	150	81	11.22	4.98	141	316	72.1	42.7	29.4	16.9	3.4	39	204	741	65	7.95	4.9	65	352	1.93	5.96	1.27	3.87	1.54	0.95	581	7.1	397		30		1.9	2.9
114	258.5	1	2	78	1	0	0	0	1	0	0	0	166	60	21.774	86	104	69	8.58	4.54	124	202	75.7	40.7	40.7			45	73	271		6.73	6.4	94	346	0.87	4.32	1.23	2.65	1.21	0.75	506			2400	9.8	136	2.2	3.7
115	249	1	1	62	1	0	1	0	1	0	0	0	174	94	31.048	70	136	70	7.94	4.43	142	191	69.4	38.9	30.5	13.9	3.9	44	64	298	495	7.78	4.6	69	393	1.39	4.45	0.83	2.94	0.92	0.82	545	7.4		483	1.6	10.5	3	4.5
116	250.25	1	2	63	1	0	0	1	1	0	0	0	160	70	27.344	86	130	86	19.36	4.93	145	231	67.3	42.9	24.4	8.8	2.7	15	36	195	423	7.45	4.2	77	300	1.38	3.37	0.94	1.8	1.17	0.59	84	7.4	20		2.7	7.84	2.4	3.6
117	125.5	1	2	70	1	0	0	0	0	0	0	0	170	70	24.221	78	130	80	7.64	4.46	143	122	59.9	38.9	21	18.8	5.8	29	76	302	445	4.74	5	72	437	1.32	2.95	0.88	1.53	1.17	0.59	75	6.2	108		5.2		1.9	3
118	164.75	1	2	75	1	0	0	0	1	0	0	0	175	70	22.857	48	118	58	6.32	3.67	118	115	60.3	36.6	23.7	12.3	2.2	34	184	597	1128	5.31	5.5	74	547	1.03	5.32	1.28	3.56	1.28	0.89	143	5		180	1.7		2.5	3.3
119	201.5	1	2	71	0	0	0	0	1	0	0	1	160	62	24.219	64	120	71	9.01	3.78	114	295	75.3	36.1	39.2	11.2	2.8	21	125	363	1855	3.56	7.7	110	288	0.39	4.86	1.42	2.74	1.31	0.73	450	4.8		1210	15		2.1	3.2
120	142.25	1	2	47	1	0	0	0	1	0	0	0	168	101	35.785	89	144	81	7.16	4.43	139	257	75.5	46.8	28.7	10.5	2.1	41	20	195						3.5	5.07	0.97	2.91	1.19	0.88	499	6.3		97	0.043		2	3.3
121	258	1	1	55	1	0	1	1	1	0	0	0	165	60	22.039	85	128	74	6.72	4.76	141	171	65.3	42.2	23.1	13.8	3.9	35	24	148	55	9.7	5.1	101	281	1.53	3.35	1.17	1.53	1.59	0.59	75		25.6		0.01
122	270.75	1	2	65	0	0	1	1	2	0	0	0	160	50	19.531	78	130	80	9.64	4.08	115	206	60.1	33.9	26.2	11.3	2.9	47	145	893	974	6.13	4.3	52	224	1.27	4.16	1.29	2.17	1.5	0.64	835			1300	2.5		2	3.4
123	581	1	2	68	1	0	1	1	0	1	0	0	175	83	27.102	107	132	91	8.5	4.87	151	238	59.2	33.3	25.9	12.9	4.2	91	50	610	339	6.81	9.2	92	568	0.92	5.75	1.16	4.13	0.89	1.02	499	11.4	2608		8.172		2.1	3.4
124	278.75	1	1	49	1	0	1	0	3	0	0	0	170	70	24.221	54	104	65	11.49	4.97	147	259	63.4	39.1	24.3	11.1	2.9	64	173	866	1568	5.09	5.7	78	353	0.97	4.68	1.05	3.23	0.86	0.85	178	5.6		259	21		2.1	3.1
125	230	1	1	50	0	0	0	0	0	0	0	0	160	57	22.266	82	113	74	8.68	4.56	121	333	64.1	34.7	29.2	9.9	2.2	33	46	179	42	5.31	2.3	45	282	1.36	5.44	1.27	3.46	1.26	0.88	822	6.5	16		0.01		2	3.1
126	145.25	1	1	71	0	0	0	1	3	0	0	0	158	55	22.032	69	162	64	6.31	4.41	130	162	62.4	34.5	27.9	10.4	2	28	38	250						1.49	5.59	1.29	3.46	1.6	0.95	248	11.3		2080	1.3
127	261.25	1	1	65	0	0	0	1	1	0	0	0	159	62	24.524	76	112	56	5.66	4.36	128	218	75.6	42.3	33.3	11.4	3	13	23	221	149	7.19	4.7	65	349	1.03	4.6	1.07	3.05	1.11	0.78	206		253		0.28	7.5	1.8	3.1
128	279.75	1	2	28	1	0	0	0	0	0	0	0	180	120	37.037	70	124	64	9.08	5.24	160	288	73.8	44.3	29.5	12.3	2.8	77	36	180	203	7.31	5.6	64	452	3.14	4.85	1.13	3.15	1.38	0.95	66			221	1.8		3.1	3.1
129	154	0	3	48	0	0	0	0	0	0	0	0	164	56	20.821	77	116	71	4.37	4.65	121	233	63	37.5	25.5	8	2.2	38	35	210	66	4.86	5.7	75	269	0.55	4.31	1.2	2.63	1.33	0.66	239				0.001
130	91.25	0	3	55	0	0	0	0	0	0	0	0	161	61	23.533	80	120	80	5.2	4.44	138	204	62.9	39.8	23.1	7.3	1.7	12	16	173	91	5.05	5	76	195	0.69	4.18	1.16	2.44	1.34	0.61	1018	5.3			0.001	0.81
131	198.75	0	3	63	0	0	0	0	0	0	0	0	160	58	22.656	76	120	80	6.41	4.22	128	196	73.9	44.8	29.1	11.5	3	20	24	217	92	4.51	6.2	56	262	1.23	5	1.9	2.74	1.8	0.71	934	5.6	98		0.001
132	74.75	0	3	65	0	0	0	0	0	0	0	0	155	48	19.979	74	128	54	4.49	4.39	128	223	64.2	41.6	22.6	10.1	2.7	11	20	156	54	5.36	4.4	47	196	0.79	5.61	1.05	4.66	1.13	1.12	295	5.4	43.3		0.001
133	156.25	0	3	68	1	0	1	1	1	0	0	0	172	86	29.07	78	130	80	4.54	5	150	127	64.8	43.4	21.4	11.4	4	62	34	173	279	7.26	4.9	90	340	1.99	3.34	1.15	1.43	1.36	0.42	54	6.5	49		0.005
134	134	0	3	39	1	0	0	0	0	0	0	0	176	82	26.472	80	137	88	7.17	5.51	164	253	60.6	42	18.6	13.6	4.7	21	17	152						1.79	3.34	0.7	2.01	1.09	0.64	60	5.1			0.0001
135	215	0	3	53	0	0	0	0	0	0	0	0	165	75	27.548	52	115	72	4.89	3.6	116	300	65.5	36.8	28.7	6.5	2	12	16	163	73	5.5	4.3	44	235	0.59	3.25	1.03	1.7	1.28	0.5	258	5.4			0.007		2.2	3.3
136	224.25	0	3	59	0	0	0	0	2	0	0	0	163	57	21.454	83	120	67	5.66	4.05	126	152	58.5	36.3	22.2	8.3	2.2	16	19	113	35	4.81	4.1	68	256	1.36	3.17	0.88	1.78	1.18	0.5	52	5.4	20		0.01		1.9	3.7
137	174	0	3	46	1	0	0	0	0	0	0	0	176	65	20.984	88	121	72	5.25	4.68	145	225	61.5	40.7	20.8	14.1	3.9	17	17	120						1.57	3.96	1.02	2.37	1.21	0.68	274				0.003
138	130.5	0	3	61	0	0	0	0	2	0	0	0	153	50	21.359	68	156	67	5.01	5.1	133	244	60.1	37.7	22.4	8.8	1.2	19	19	175	65	4.54	3.4	56	267	0.96	4.91	1.48	2.8	1.45	0.78	187	5.5	63		0.01		2	3.1
139	73	0	3	52	0	0	0	0	0	0	0	0	168	59	20.904	99	122	75	4.75	4.07	121	240	63.9	37.9	26	20.5	6.3	14	16	138	63	4.69	3.7	66	244	0.36	3.62	1.69	1.57	1.6	0.48	121	5.4			0.01		1.9	3
140	207	0	3	69	1	0	1	0	1	0	0	0	166	75	27.217	72	147	77	8.19	4.92	148	230	63.7	41.9	21.8	17.3	4.6	12	18	185		4.68	5.8	88	390	2.13	5.39	1.1	3.33	1.31	0.93	62		6.3		0.01		2.4	3.7
141	82.25	0	3	33	0	0	0	0	0	0	0	0	163	101	38.014	110	148	104	7.54	4.92	143	303	82.4	47.4	35	12.5	4	61	50	239		5.53	3.6	45	314	1.47	4.45	1.05	2.69	1.29	0.72	74				0.01		1.9	3.1
142	146.25	0	3	77	0	0	0	0	1	0	0	0	160	47	18.359	85	151	80	3.58	3.31	107	157	63.6	40	23.6	11.7	2.6	14	18	162	90	5.61	5.4	64	230	0.67	5.18	1.54	2.9	1.54	0.79	186	5.7		358	0.01		1.9	2.7
143	215	0	3	55	1	0	1	0	0	0	1	0	170	75	25.952	99	110	80	7.15	4.51	141	180	65.2	41.4	23.8	11.8	2.7	15	14	177	58	5.14	4.3	79	492	2.66	5	1.16	2.96	1.21	0.84	139						2	2.5
144	205	0	3	47	0	0	0	1	0	0	0	0	170	75	25.952	76	106	61	6.39	5.79	126	193	77.5	40.6	36.9	11.6	3.2	28	20	169	28	9.78	3.6	51	230	2.23	4.46	0.79	2.89	0.85	0.82	30	10.2	5		0.01		2.3	3.5
145	259.25	0	3	55	1	0	0	0	0	0	0	0	160	63	24.609	62	118	72	6	4.9	153	240	76.3	48.9	27.4	10.3	2.3	47	28	197	280	5.39	6.3	82	424	2.47	5.89	1.36	3.73	1.61	1.49	145		7		0		2	3.2
146	63.25	0	3	47	0	0	0	0	0	0	0	0	157	62	25.153	96	115	62	7.52	4.33	141	192	71.7	42	29.7	15.9	3.8	10	19	191	196	4.76	3.1	70	269	0.6	4.39	1.76	2	1.86	0.63	49	5.2			0.01		1.9	3
147	84	0	3	56	1	0	1	0	1	0	0	0	168	66	23.384	98	122	84	3.33	5.06	153	188	77.1	26	32.9	12.4	3.7	26	20	153	56	5.14	5.1	82	495	1.71	3.87	0.84	2.33	1.06	0.78	10	5.1		8	0.01		2.5	3.2
[truncated: 17 more columns]
